# Supplementary material for: Minimal domain of bacterial phytochrome required for chromophore binding and fluorescence
Source: PubMed Central journal article supplement (PMC4683375; doi:10.1038/srep18348), 2015-12-18
Supplement: srep18348-s1.pdf [file srep18348-s1.pdf]

# Minimal domain of bacterial phytochrome required for chromophore binding and fluorescence

**Konstantin A. Rumyantsev, Daria M. Shcherbakova, Natalia I. Zakharova, Alexander V. Emelyanov, Konstantin K. Turoverov and Vladislav V. Verkhusha**

## Supplementary Materials

### Supplementary Figures

**Supplementary Figure 1.** The structural formula of GAF-FP chromophores.

**Supplementary Figure 2.** The pH dependence of the normalized fluorescence excitation and emission spectra of GAF-FP bound to BV.

**Supplementary Figure 3.** Bioluminescence resonance energy transfer between *RLuc8* and GAF-FP.

**Supplementary Figure 4.** Screening for optimal chimeric fusion construct between *RLuc8* and GAF-FP.

### Supplementary Tables

**Supplementary Table 1.** Spectral and biochemical properties of the GAF-FP insertion variants.

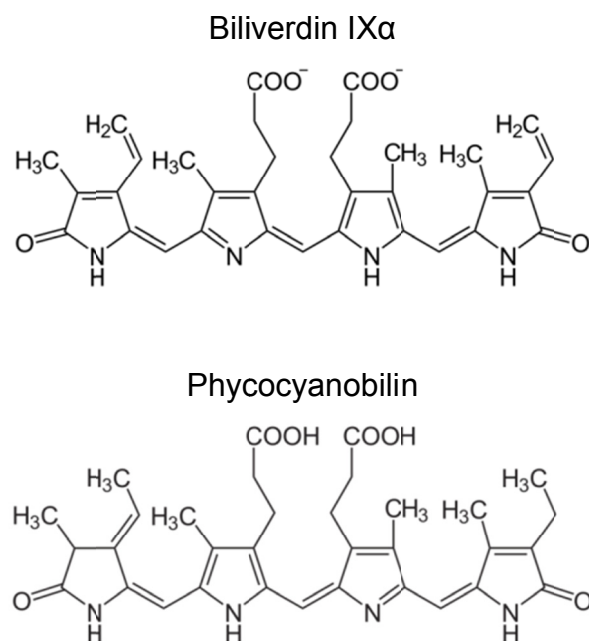

**Supplementary Figure 1. The structural formula of GAF-FP chromophores.** Biliverdin IX $\alpha$  (BV) and phycocyanobilin (PCB) are linear tetrapyrroles enzymatically derived from a heme.

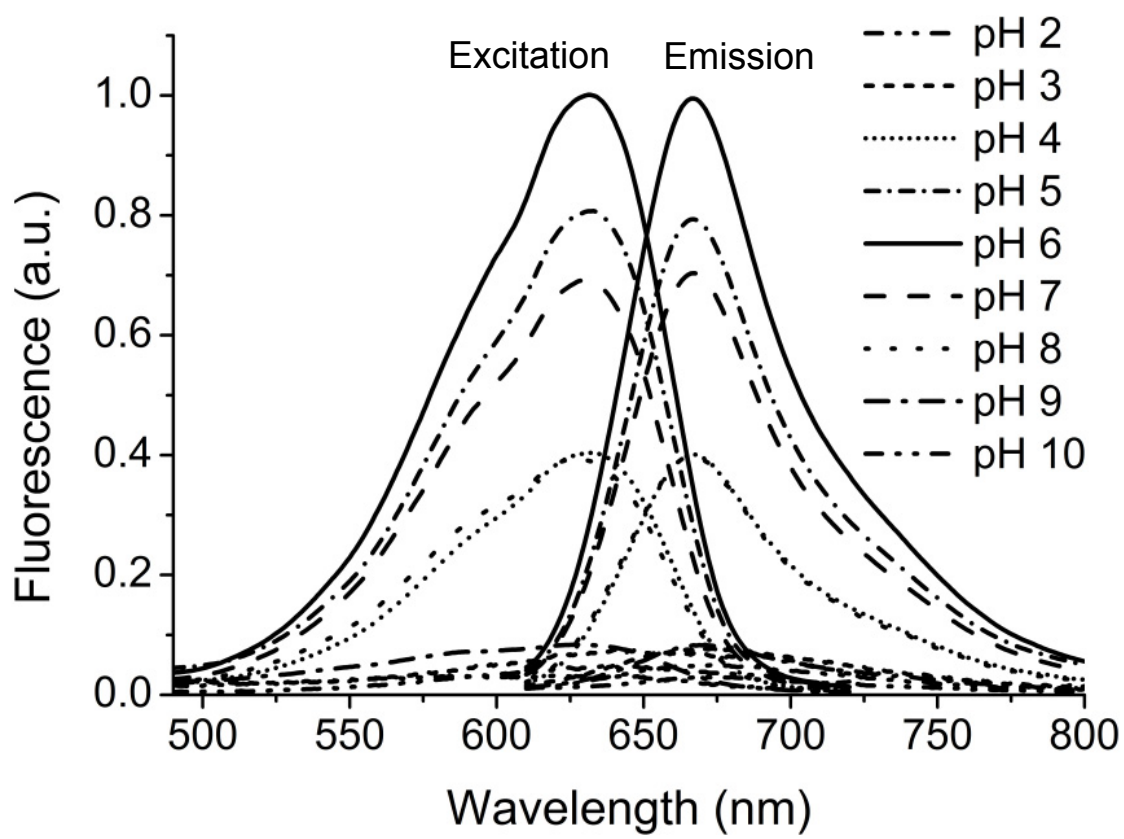

**Supplementary Figure 2. The pH dependence of the normalized fluorescence excitation and emission spectra of GAF-FP bound to BV.**

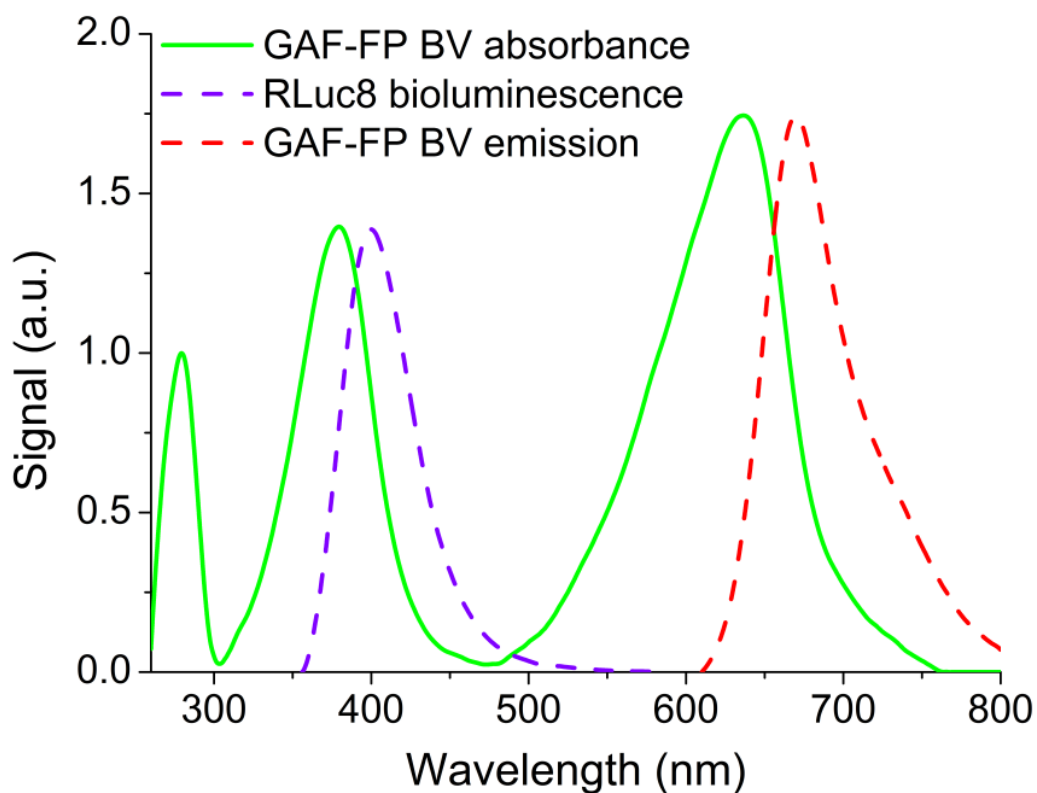

**Supplementary Figure 3. Bioluminescence resonance energy transfer between *RLuc8* and *GAF-FP*.** Energy of the substrate oxidized by *RLuc8* migrates via BRET to Soret band of *GAF-FP*. As a result, *GAF-FP* emits photons in its normal emission spectrum, leading to the appearance of NIR bioluminescence.

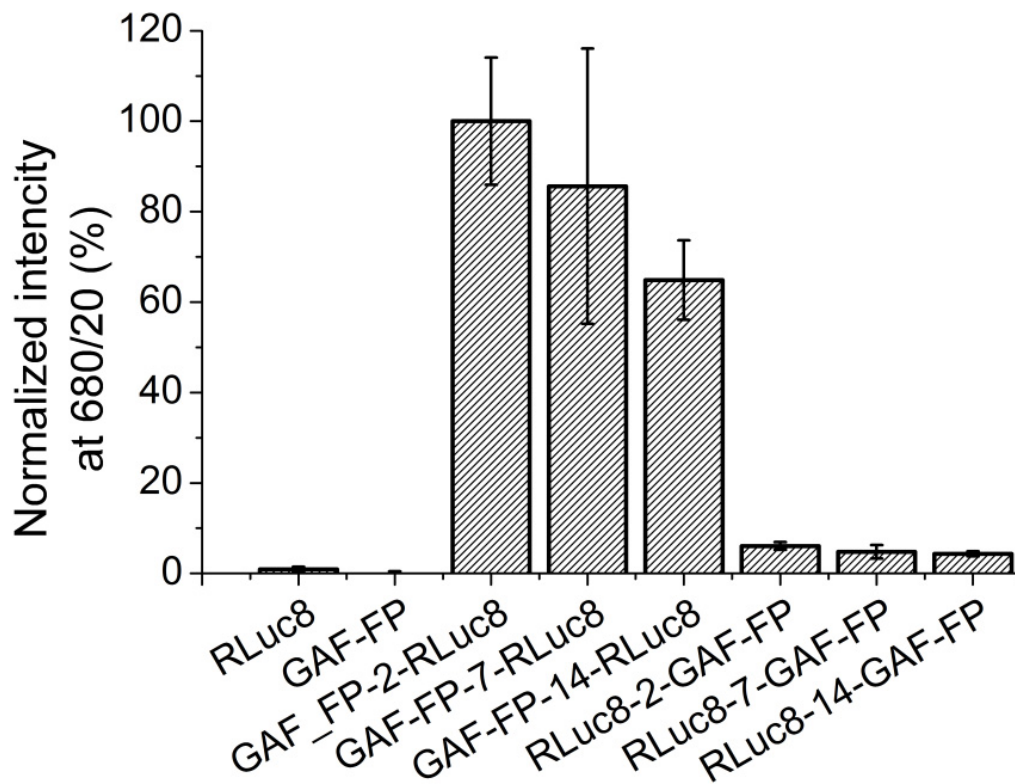

**Supplementary Figure 4. Screening for optimal chimeric fusion construct between *RLuc8* and *GAF-FP*.** All the proteins were compared for near-infrared signal intensity when expressed in bacteria. The sample with the highest signal was taken as 100%, while the lowest as 0%. Error bars, s.d. (n = 3).

**Supplementary Table 1.** Spectral and biochemical properties of the GAF-FP insertion variants.

| <b>Insertion variant</b> | <b>Excitation maximum (nm)</b> | <b>Emission maximum (nm)</b> | <b>Extinction coefficient (<math>M^{-1} cm^{-1}</math>)</b> | <b>Quantum yield (%)</b> | <b>Molecular brightness relative to GAF-FP BV (%)</b> | <b>Maturation <math>t_{50\%}</math> at 37°C (h)</b> | <b>pKa<sub>1</sub></b> | <b>pKa<sub>2</sub></b> | <b>Brightness in <i>E. coli</i> at 37°C relative to GAF-FP BV (%)</b> |
|--------------------------|--------------------------------|------------------------------|-------------------------------------------------------------|--------------------------|-------------------------------------------------------|-----------------------------------------------------|------------------------|------------------------|-----------------------------------------------------------------------|
| GAF-FP i1 BV             | 635                            | 670                          | 45,650                                                      | 5.7                      | 72                                                    | 4.1                                                 | 4.8                    | 8.1                    | 58                                                                    |
| GAF-FP i2 BV             | 635                            | 670                          | 52,300                                                      | 6.5                      | 94                                                    | 3.7                                                 | 4.7                    | 8.1                    | 111                                                                   |
| GAF-FP i3 BV             | 635                            | 670                          | 49,600                                                      | 6.2                      | 85                                                    | 5.4                                                 | 4.7                    | 8.0                    | 56                                                                    |
| GAF-FP i4 BV             | 635                            | 670                          | 47,400                                                      | 5.5                      | 72                                                    | 5.1                                                 | 4.6                    | 7.8                    | 60                                                                    |
| GAF-FP i1 PCB            | 625                            | 657                          | 66,500                                                      | 12.4                     | 227                                                   | 3.0                                                 | 4.4                    | 9.1                    | 111                                                                   |
| GAF-FP i2 PCB            | 625                            | 657                          | 83,000                                                      | 12.7                     | 290                                                   | 3.3                                                 | 4.6                    | 8.6                    | 182                                                                   |
| GAF-FP i3 PCB            | 625                            | 657                          | 81,500                                                      | 12.8                     | 287                                                   | 4.4                                                 | 4.7                    | 8.2                    | 55                                                                    |
| GAF-FP i4 PCB            | 625                            | 657                          | 72,500                                                      | 11.4                     | 227                                                   | 3.7                                                 | 4.8                    | 8.4                    | 158                                                                   |
